# Supplementary material
Source: publisher site journal article supplement (https://www.dovepress.com/article/256696)

**Supplementary Table 1** Baseline characteristics of LARC patients in the FMUUh cohort

| <b>Variables</b>                              | <b>(n=118)</b> |
|-----------------------------------------------|----------------|
| Sex (%)                                       |                |
| Male                                          | 75 (63.6)      |
| Female                                        | 43 (36.4)      |
| Age (years)                                   | 54.3 ± 13.3    |
| Distance from the anal verge (cm)             | 5.6 ± 1.7      |
| Tumor differentiation (%)                     |                |
| Well or moderately differentiated             | 85 (72.0)      |
| Poorly differentiated and others <sup>a</sup> | 33 (28.0)      |
| Histopathology (%)                            |                |
| Adenocarcinoma                                | 93 (78.8)      |
| Mucinous or signet ring adenocarcinoma        | 25 (21.2)      |
| TRG (%)                                       |                |
| 0                                             | 21 (17.8)      |
| 1                                             | 25 (21.2)      |
| 2                                             | 48 (40.7)      |
| 3                                             | 24 (20.3)      |
| ypTNM stage (%)                               |                |
| 0                                             | 23 (19.5)      |
| I                                             | 23 (19.5)      |
| II                                            | 34 (28.8)      |
| III                                           | 38 (32.2)      |

Data are expressed as number (%) or as median ± standard deviation, where appropriate.

SD: standard deviation; CEA: carcinoembryonic antigen; TRG: tumor regression grade; ypTNM stage: post-chemoradiotherapy pathological TNM stage

<sup>a</sup> including mucinous and signet cell carcinoma

**Supplementary Table 2** Ten hub genes in the coexpression Tan module

| <b>Official symbol</b> | <b>Official full name</b>                       | <b>Also known as</b>                                                                      | <b>Gene ID</b> | <b>Location</b> |
|------------------------|-------------------------------------------------|-------------------------------------------------------------------------------------------|----------------|-----------------|
| NOTCH3                 | notch receptor 3                                | CADASIL,<br>CADASIL1,<br>CASIL, IMF2,<br>LMNS                                             | 4854           | 19p13.12        |
| SPARC                  | secreted protein acidic<br>and cysteine rich    | BM-40, OI17,<br>ON, ONT                                                                   | 6678           | 5q33.1          |
| DCN                    | decorin                                         | CSCD,<br>DSPG2, PG40,<br>PGII, PGS2,<br>SLRR1B                                            | 1634           | 12q21.33        |
| ITGB1                  | integrin subunit beta 1                         | CD29, FNRB,<br>GPIIA, MDF2,<br>MSK12,<br>VLA-BETA,<br>VLAB                                | 3688           | 10p11.22        |
| MMP2                   | matrix metalloproteinase<br>2                   | CLG4;<br>MONA;<br>CLG4A;<br>MMP-2;<br>TBE-1;<br>MMP-II                                    | 4313           | 16q12.2         |
| THBS2                  | thrombospondin 2                                | TSP2                                                                                      | 7058           | 6q27            |
| COL15A1                | collagen type XV alpha 1<br>chain               | /                                                                                         | 1306           | 9q22.33         |
| CD34                   | CD34 molecule                                   | /                                                                                         | 947            | 1q32.2          |
| PDGFRB                 | platelet derived growth<br>factor receptor beta | IMF1; KOGS;<br>IBGC4;<br>JTK12;<br>PDGFR;<br>PENTT;<br>CD140B;<br>PDGFR1;<br>PDGFR-1      | 5159           | 5q32            |
| SERPINH1               | serpin family H member<br>1                     | CBP1; CBP2;<br>OI10; gp46;<br>AsTP3;<br>HSP47;<br>PIG14;<br>PPROM;<br>RA-A47;<br>SERPINH2 | 871            | 11q13.5         |

**Supplementary Table 3** Cox regression analysis of predictors for disease-free survival in patients with rectal cancer patients in the FMUUh cohort (n=118)

| Genes    | Univariate |             |                | Multivariate |             |                |
|----------|------------|-------------|----------------|--------------|-------------|----------------|
|          | HR         | 95% CI      | <i>P</i> value | HR           | 95% CI      | <i>P</i> value |
| NOTCH3   | 2.370      | 1.679-3.344 | <0.001         | 1.668        | 1.087-2.559 | 0.019          |
| SPARC    | 2.762      | 1.880-4.057 | <0.001         | 1.849        | 1.241-2.756 | 0.003          |
| DCN      | 0.468      | 0.333-0.657 | <0.001         | 0.607        | 0.385-0.959 | 0.032          |
| ITGB1    | 4.129      | 2.614-6.521 | <0.001         | 1.773        | 1.006-3.126 | 0.048          |
| MMP2     | 1.958      | 1.393-2.752 | <0.001         | 1.265        | 0.845-1.893 | 0.253          |
| THBS2    | 0.437      | 0.302-0.631 | <0.001         | 0.790        | 0.553-1.130 | 0.198          |
| COL15A1  | 0.693      | 0.520-0.924 | 0.012          | 0.752        | 0.473-1.195 | 0.227          |
| CD34     | 0.533      | 0.386-0.737 | <0.001         | 0.650        | 0.396-1.068 | 0.089          |
| PDGFRB   | 1.020      | 0.774-1.344 | 0.887          |              |             |                |
| SERPINH1 | 1.044      | 0.742-1.468 | 0.805          |              |             |                |

FMUUh: Fujian Medical University Union Hospital; HR: hazard ratio; CI: confidence interval

**Supplementary Table 4** Association between risk score and clinicopathological characteristic of LARC patients in the FMUUh cohort (n=118)

| Characteristics                        | Risk score  |             | P value |
|----------------------------------------|-------------|-------------|---------|
|                                        | Low (n=59)  | High (n=59) |         |
| Gender (%)                             |             |             | 0.566   |
| Male                                   | 36 (61.0)   | 39 (66.1)   |         |
| Female                                 | 23 (39.0)   | 20 (33.9)   |         |
| Age (years)                            | 54.7 ± 12.5 | 53.9 ± 14.1 | 0.731   |
| BMI (kg/m <sup>2</sup> )               | 22.6 ± 2.9  | 22.6 ± 3.4  | 0.979   |
| Distance from the anal verge (cm)      | 5.6 ± 1.6   | 5.5 ± 1.7   | 0.651   |
| Histopathology (%)                     |             |             | 0.499   |
| Adenocarcinoma                         | 48 (81.4)   | 45 (76.3)   |         |
| Mucinous or signet ring adenocarcinoma | 11 (18.6)   | 14 (23.7)   |         |
| Tumor differentiation (%)              |             |             | 0.151   |
| Well/moderately differentiated         | 46 (78.0)   | 39 (66.1)   |         |
| Poorly differentiated                  | 13 (22.0)   | 20 (33.9)   |         |
| TRG (%)                                |             |             | <0.001  |
| 0                                      | 19 (32.2)   | 2 (3.4)     |         |
| 1                                      | 12 (20.3)   | 13 (22.0)   |         |
| 2                                      | 21 (35.6)   | 27 (45.8)   |         |
| 3                                      | 7 (11.9)    | 17 (28.8%)  |         |
| ypTNM stage (%)                        |             |             | <0.001  |
| 0                                      | 21 (35.6)   | 2 (3.4)     |         |
| I                                      | 15 (25.4)   | 8 (13.6)    |         |
| II                                     | 14 (23.7)   | 20 (33.9)   |         |
| III                                    | 9 (15.3)    | 29 (49.2)   |         |

Data are expressed as number (%) or as median ± standard deviation, where appropriate.

LARC: locally advanced rectal cancer; FMUUh: Fujian Medical University Union Hospital; BMI: body mass index; TRG: tumor regression grade; ypTNM stage: post-chemoradiotherapy pathological TNM stage

**Supplementary Table 5** Cox regression analysis of predictors for DFS in patients with LARC following NCRT in the FMUOH cohort (n=118)

| Factors                                                                          | Univariate |              |         | Multivariate |             |         |
|----------------------------------------------------------------------------------|------------|--------------|---------|--------------|-------------|---------|
|                                                                                  | HR         | 95% CI       | P value | HR           | 95% CI      | P value |
| Sex, male/female                                                                 | 1.076      | 0.555-2.087  | 0.827   |              |             |         |
| Age                                                                              | 0.996      | 0.972-1.020  | 0.716   |              |             |         |
| ASA score                                                                        | 0.963      | 0.526-1.763  | 0.902   |              |             |         |
| BMI                                                                              | 0.978      | 0.883-1.083  | 0.667   |              |             |         |
| Tumor distance from the anal verge                                               | 1.043      | 0.879-1.237  | 0.630   |              |             |         |
| Tumor size                                                                       | 1.225      | 0.905-1.659  | 0.189   |              |             |         |
| Preoperative chemotherapy regimen (oxaliplatin based vs. fluoropyrimidine only)  | 0.533      | 0.164-1.731  | 0.295   |              |             |         |
| Time interval to surgery                                                         | 1.007      | 0.912-1.112  | 0.889   |              |             |         |
| Surgery approach (laparoscopic vs. open)                                         | 0.889      | 0.475-1.665  | 0.713   |              |             |         |
| Histopathology (mucinous or signet ring adenocarcinoma vs. adenocarcinoma)       | 0.776      | 0.343-1.754  | 0.542   |              |             |         |
| Tumor differentiation (poorly differentiated vs. well/moderately differentiated) | 1.369      | 0.706-2.654  | 0.352   |              |             |         |
| Preoperative CEA level                                                           | 0.996      | 0.975-1.018  | 0.713   |              |             |         |
| TRG                                                                              | 1.587      | 1.123-2.244  | 0.009   | 0.515        | 0.311-0.853 | 0.010   |
| ypTNM stage                                                                      | 2.323      | 1.582-3.409  | <0.001  | 1.682        | 1.035-2.73  | 0.036   |
| IMA nodal metastasis                                                             | 5.504      | 1.679-18.044 | 0.005   | 1.568        | 0.458-5.366 | 0.474   |
| CRM involvement                                                                  | 4.751      | 1.118-20.182 | 0.035   | 1.332        | 0.294-6.032 | 0.709   |
| Risk score                                                                       | 2.661      | 1.999-3.542  | <0.001  | 2.855        | 2.038-4.000 | <0.001  |

DFS: disease-free survival; LARC: locally advanced rectal cancer; NCRT: neoadjuvant chemoradiotherapy; MUOH: Fujian Medical University Union Hospital; HR: hazard ratio; CI: confidence interval; ASA: American Society of Anesthesiologists; BMI: body mass index; CEA: carcinoembryonic antigen; TRG: tumor regression grade; ypTNM stage: post-chemoradiotherapy pathological TNM stage; IMA: inferior mesenteric artery; CRM: circumferential resection margin.

## **Supplementary Figure legend**

**Figure s1** Immunostaining expression of the ten hub genes

**Figure s2** Validation of the expression of the ten hub genes in TCGA using GEPIA

negative (-)

weakly positive (+)

positive (++)

strongly positive (+++)

NOTCH3

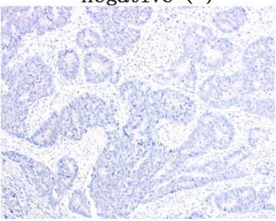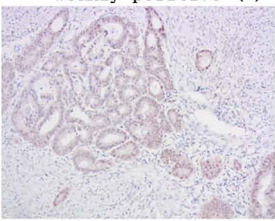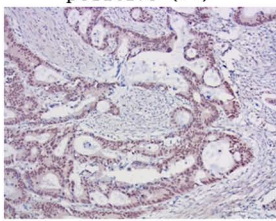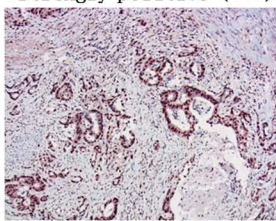

SPARC

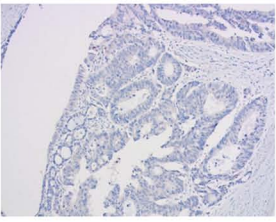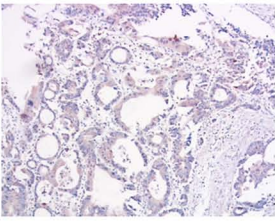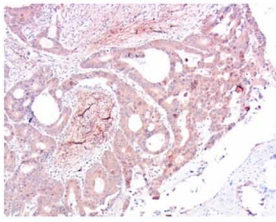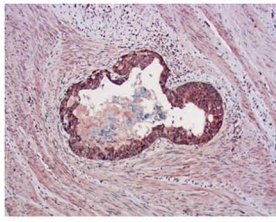

DCN

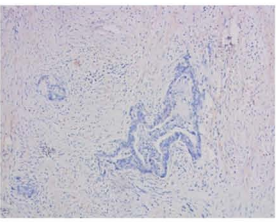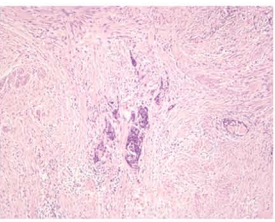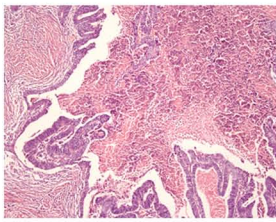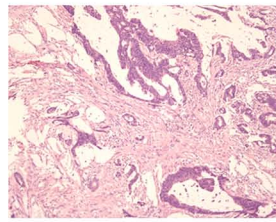

ITGB1

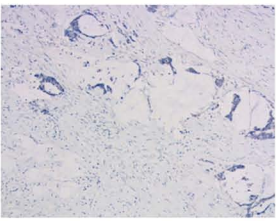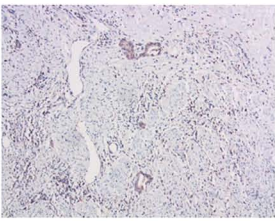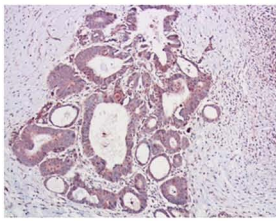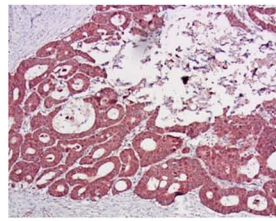

MMP2

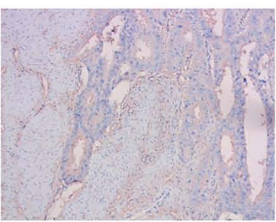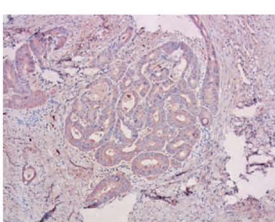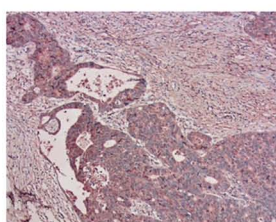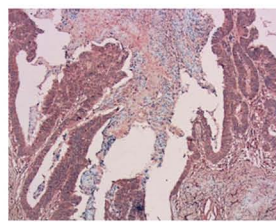

THBS2

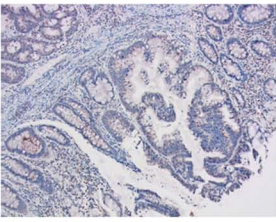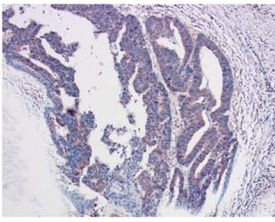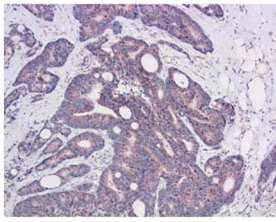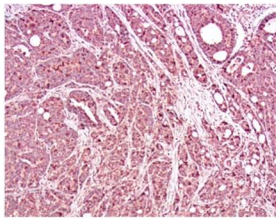

COL1A1

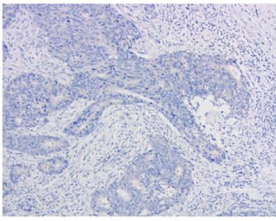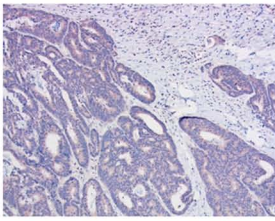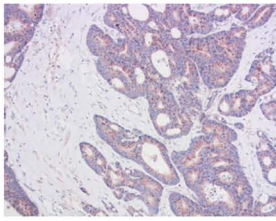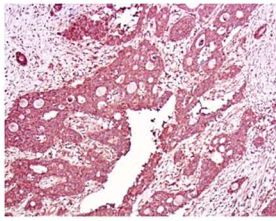

CD34

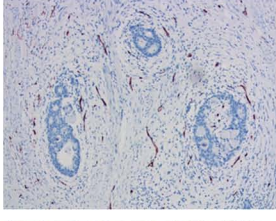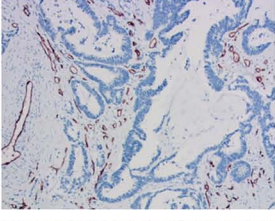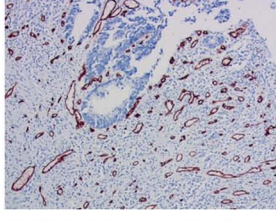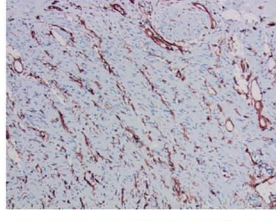

PDGFR

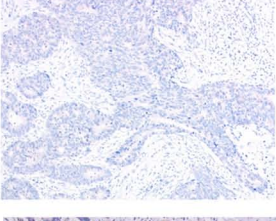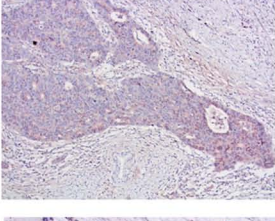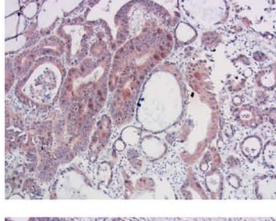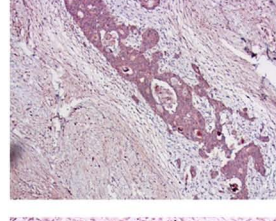

SERPINH1

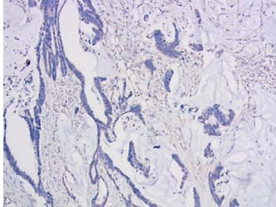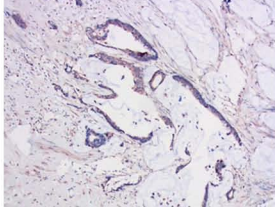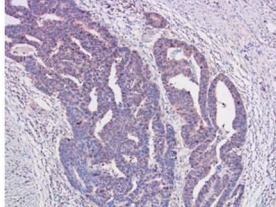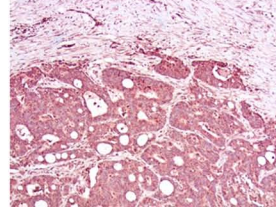

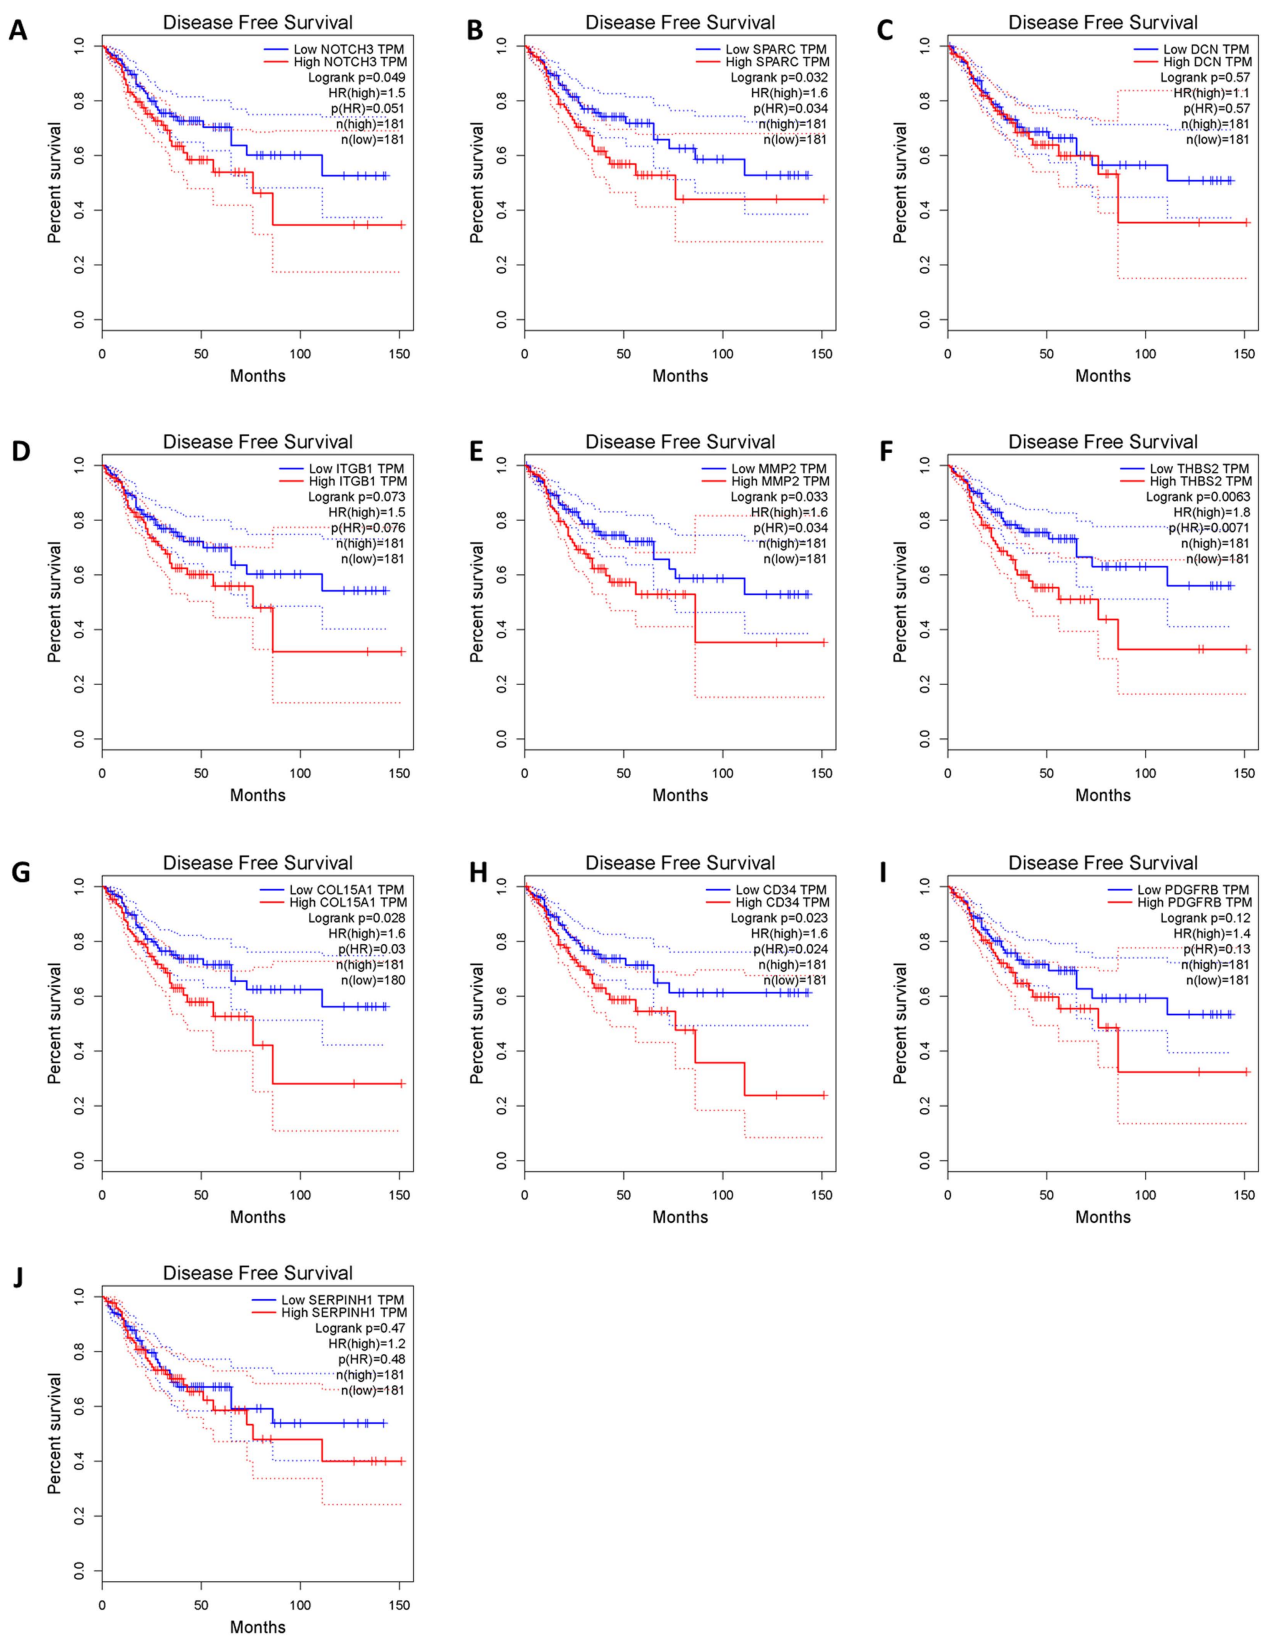

Supplement: Supplementary file 1 [file get_supplementary_file.php]
